# Supplementary material for: The Skin-Mucus Microbial Community of Farmed Atlantic Salmon (Salmo salar)
Source: PubMed Central journal article supplement (PMC5655796; doi:10.3389/fmicb.2017.02043), 2017-10-20
Supplement: Supplementary_Materials.pdf [file Supplementary_Materials.pdf]

## *Supplementary Material*

### **The skin-mucus microbial community of farmed Atlantic salmon (*Salmo salar*)**

Giusi Minniti<sup>1</sup>, Live Heldal Hagen<sup>1</sup>, Davide Porcellato<sup>1</sup>, Sven Martin Jørgensen<sup>2</sup>, Phillip B. Pope<sup>1\*</sup> and Gustav Vaaje-Kolstad<sup>1\*</sup>

<sup>1</sup>Faculty of Chemistry, Biotechnology and Food Science, Norwegian University of Life Sciences (NMBU), Ås, Norway

<sup>2</sup>Nofima AS, Norwegian Institute of Food, Fisheries & Aquaculture Research, Ås, Norway.

\*Corresponding authors: Philip B. Pope and Gustav Vaaje-Kolstad

Keywords: skin, mucus, teleost, microbiome, stress, aquaculture, *Salmo salar*

**Supplementary Materials and Methods**

List of commands and parameters used for the 16S analysis:

Merging:

```
>usearch8 -fastq_mergepairs for_R1.fastq -reverse rev_R2.fastq -
fastqout merged.fastq -fastq_minmergelen 300
```

Quality filtering:

```
>usearch8 -fastq_filter merged.fastq -fastq_maxee 1.0 -fastaout
filtered.fasta
```

The fasta files from all samples were concatenated to one file (also called filtered.fasta) using cat.

Identification of unique sequences:

```
>usearch8 -derep_fulllength filtered.fasta -sizeout -fastaout
uniques.fasta
```

Removing singletons:

```
>usearch8 -sortbysize uniques.fasta -fastaout seqs_sorted.fasta -
minsize 2
```

Trimming sequence length:

```
>usearch8 -fastx_truncate seqs_sorted.fasta -truncflen 430 -label_suffix
_430 -fastaout seqs_sorted_430.fasta
```

Removing chimera sequences and clustering:

```
>usearch8 -cluster_otus seqs_sorted_430.fasta -otus otus.fasta -
uparseout out_430.up -relabel OTU
```

Assigning taxonomy and making the OTU table:

```
>usearch8 -utax otus.fasta -db refdbF.ubd -strand both -fastaout
otus_tax_430.fasta
```

```
>usearch8 -usearch_global filtered.fasta -db otus_tax_430.fasta -strand
plus -id 0.97 -otutabout otu_table.txt
```

The tab-delimited OTU table was subsequently converted to biom table using biom convert:

```
>biom convert -i otu_table.txt -o otu_table.biom --table-type="OTU
table" --process-obs-metadata taxonomy
```

Filtering out OTUs less than 0.005% of the total sequences in QIIME:

```
>filter_otus_from_otu_table.py -i otu_table.biom -o otu_table_min5.biom
--min_count_fraction 0.00005
```

Performing rarefaction on the OTU table based on the smallest library (22070seqs/sample):

```
>single_rarefaction.py -i otu_table_min5.biom -o
otu_table_min5_even.biom -d 22070
```

QIIME core diversity analyses:

```
>core_diversity_analyses.py -o core_analysis -i
otu_table_min5_even.biom -m mapping_file.txt -c
Category1,Category2,Category3 -e 22070 -t rep_set.tre
```

## Supplementary Tables and Figures

**Supplementary Table S1.** DNA concentrations of mucus and water samples, measured with Qubit fluorometer and the Quant-iT dsDNA HS assay kit. DNA concentrations falling below the minimum quantitative range for the Quant-iT HS assay are noted as not detected (n.d.). The presence (+) or absence (-) of PCR products are specified, in addition to the number of sequences/sample after quality trimming. Samples not included in the analysis are noted as not included (n.i.).

| Sample ID | DNA conc.<br>(ng/ml) | PCR | Sequences<br>(n) |
|-----------|----------------------|-----|------------------|
| M1-0h-1   | 0.14                 | +   | 51521            |
| M2-0h-1   | 0.33                 | +   | 54984            |
| M3-0h-1   | 0.40                 | +   | 41772            |
| M4-0h-1   | 0.36                 | +   | 54460            |
| M5-0h-1   | 0.40                 | +   | 74525            |
| M6-0h-1   | 0.10                 | +   | 50170            |
| M7-0h-1   | n.d.                 | +   | 47123            |
| M8-0h-1   | n.d.                 | +   | 29579            |
| M9-0h-1   | n.d.                 | +   | 45413            |
| M10-0h-1  | 0.16                 | +   | 26697            |
| M11-0h-1  | n.d.                 | +   | 39172            |
| M12-0h-1  | n.d.                 | -   | n.i.             |
| M13-0h-1  | n.d.                 | -   | n.i.             |
| M14-0h-1  | n.d.                 | -   | n.i.             |
| M15-0h-1  | n.d.                 | -   | n.i.             |
| M1-3h-2   | 0.34                 | +   | 43979            |
| M2-3h-2   | 1.10                 | +   | 40594            |
| M3-3h-3   | 0.23                 | +   | 39289            |
| M4-3h-3   | 0.21                 | +   | 56028            |
| M5-3h-3   | 0.46                 | +   | 44608            |
| M6-3h-3   | 0.12                 | +   | 24949            |
| M7-3h-3   | 0.11                 | +   | 57458            |
| M8-3h-3   | n.d.                 | -   | n.i.             |
| M9-3h-3   | n.d.                 | -   | n.i.             |
| M10-3h-3  | n.d.                 | -   | n.i.             |
| M11-3h-3  | n.d.                 | -   | n.i.             |
| M12-3h-3  | n.d.                 | -   | n.i.             |
| M13-3h-3  | n.d.                 | -   | n.i.             |
| M14-3h-3  | n.d.                 | -   | n.i.             |
| M15-3h-3  | n.d.                 | -   | n.i.             |
| M1-24h-2  | 0.26                 | +   | 30325            |
| M2-24h-2  | 0.12                 | +   | 48690            |
| M3-24h-2  | 0.22                 | +   | 30017            |
| M4-24h-2  | 0.33                 | +   | 69534            |
| M5-24h-2  | 0.23                 | +   | 62707            |
| M6-24h-2  | 0.21                 | +   | 77228            |
| M7-24h-3  | 0.47                 | +   | 54839            |
| M8-24h-3  | 0.16                 | +   | 45539            |
| M9-24h-3  | 0.20                 | +   | 42385            |

---

|           |      |   |       |
|-----------|------|---|-------|
| M10-24h-3 | 0.18 | + | 68933 |
| M11-24h-3 | 0.21 | + | 75218 |
| M12-24h-3 | n.d. | + | 66863 |
| M13-24h-3 | 0.31 | + | 46470 |
| M14-24h-3 | n.d. | - | n.i.  |
| M15-24h-3 | n.d. | - | n.i.  |
| W1-T0-1   | 1.23 | + | 27086 |
| W2-T0-1   | 2.55 | + | 34693 |
| W3-T0-1   | 3.37 | + | 22070 |
| W1-Ctrl-2 | 2.05 | + | 29241 |
| W2-Ctrl-2 | 3.04 | + | 57359 |
| W3-Ctrl-2 | 2.39 | + | 51639 |
| W1-Ctrl-3 | 1.13 | + | 98187 |
| W2-Ctrl-3 | 2.01 | + | 62745 |
| W3-Ctrl-3 | 3.19 | + | 62536 |
| W1-T3-2   | 2.97 | + | 83736 |
| W2-T3-2   | 4.01 | + | 85584 |
| W3-T3-2   | 3.89 | + | 60564 |
| W1-T3-3   | 2.10 | + | 48070 |
| W2-T3-3   | 2.02 | + | 48462 |
| W3-T3-3   | 3.15 | + | 39664 |
| W1-T24-2  | 1.99 | + | 67986 |
| W2-T24-2  | 4.09 | + | 63784 |
| W3-T24-2  | 2.09 | + | 31459 |
| W1-T24-3  | 4.00 | + | 68445 |
| W2-T24-3  | 3.86 | + | 32160 |
| W3-T24-3  | 3.14 | + | 74109 |

---

**Supplementary Table S2.** Droplet Digital PCR concentration values (target DNA copies/ $\mu$ L) of each replicate (R1, R2, R3) obtained from the QuantaSoft software. These values were used to calculate the number of copies/ $\mu$ L in the initial mucus and water samples at different time points (T0, T3, T24 in addition to water control; Ctrl) as explained in Materials and Methods.

| <b>Sample ID</b> | <b>R1</b> | <b>R2</b> | <b>R3</b> | <b>Average<math>\pm</math>StDev</b> | <b>Copies/<math>\mu</math>L in initial samples</b> |
|------------------|-----------|-----------|-----------|-------------------------------------|----------------------------------------------------|
| M1-T0-1          | 19.55     | 26.35     | 31.40     | 25.77 $\pm$ 5.95                    | 283                                                |
| M2-T0-1          | 162.75    | 161.35    | 194.60    | 172.90 $\pm$ 18.81                  | 1902                                               |
| M3-T0-1          | 550.75    | 533.35    | 633.60    | 572.57 $\pm$ 53.57                  | 6298                                               |
| M4-T0-1          | 336.75    | 715.35    | 777.60    | 609.90 $\pm$ 238.59                 | 6709                                               |
| M5-T0-1          | 610.75    | 536.35    | 611.60    | 586.23 $\pm$ 43.20                  | 6449                                               |
| M6-T0-1          | 62.25     | 57.65     | 58.70     | 59.53 $\pm$ 2.41                    | 655                                                |
| M7-T0-1          | 5.65      | 4.05      | 3.60      | 4.43 $\pm$ 1.08                     | 49                                                 |
| M8-T0-1          | 4.85      | 4.95      | 4.80      | 4.87 $\pm$ 0.08                     | 54                                                 |
| M9-T0-1          | 8.45      | 10.85     | 10.40     | 9.90 $\pm$ 1.28                     | 109                                                |
| M10-T0-1         | 33.55     | 26.75     | 29.00     | 29.77 $\pm$ 3.46                    | 327                                                |
| M11-T0-1         | 9.35      | 4.55      | 3.00      | 5.63 $\pm$ 3.31                     | 62                                                 |
| M1-T3-2          | 161.75    | 148.35    | 132.60    | 147.57 $\pm$ 14.59                  | 1623                                               |
| M2-T3-2          | 163.60    | 122.60    | 143.60    | 143.27 $\pm$ 20.50                  | 1576                                               |
| M3-T3-3          | 115.75    | 97.35     | 96.60     | 103.23 $\pm$ 10.85                  | 1136                                               |
| M4-T3-3          | 280.75    | 326.60    | 204.60    | 270.65 $\pm$ 61.62                  | 2977                                               |
| M5-T3-3          | 511.75    | 457.35    | 460.60    | 476.57 $\pm$ 30.51                  | 5242                                               |
| M6-T3-3          | 39.65     | 32.95     | 30.60     | 34.40 $\pm$ 4.70                    | 378                                                |
| M7-T3-3          | 183.75    | 190.35    | 164.60    | 179.57 $\pm$ 13.38                  | 1975                                               |
| M1-T24-2         | 23.15     | 14.85     | 14.70     | 17.57 $\pm$ 4.84                    | 193                                                |
| M2-T24-2         | 17.75     | 12.35     | 13.10     | 14.40 $\pm$ 2.93                    | 158                                                |
| M3-T24-2         | 8.35      | 6.55      | 5.80      | 6.90 $\pm$ 1.31                     | 76                                                 |
| M4-T24-2         | 8.45      | 15.35     | 12.60     | 12.13 $\pm$ 3.47                    | 133                                                |
| M5-T24-2         | 9.55      | 17.45     | 19.00     | 15.33 $\pm$ 5.07                    | 169                                                |
| M6-T24-2         | 15.75     | 11.05     | 22.60     | 16.47 $\pm$ 5.81                    | 181                                                |
| M7-T24-3         | 72.65     | 26.85     | 33.90     | 44.47 $\pm$ 24.66                   | 489                                                |
| M8-T24-3         | 40.05     | 24.35     | 27.30     | 30.57 $\pm$ 8.34                    | 336                                                |
| M9-T24-3         | 26.10     | 23.00     | 15.40     | 21.50 $\pm$ 5.51                    | 237                                                |
| M10-T24-3        | 17.05     | 16.35     | 22.00     | 18.47 $\pm$ 3.08                    | 203                                                |
| M11-T24-3        | 277.75    | 293.75    | 315.60    | 295.70 $\pm$ 19.00                  | 3253                                               |
| M12-T24-3        | 25.45     | 31.45     | 32.50     | 29.80 $\pm$ 3.80                    | 328                                                |
| M13-T24-3        | 12.25     | 17.25     | 19.10     | 16.20 $\pm$ 3.54                    | 178                                                |
| W1-T0-1          | 612.75    | 535.35    | 724.60    | 624.23 $\pm$ 95.15                  | 6867                                               |
| W2-T0-1          | 589.75    | 560.35    | 790.60    | 646.90 $\pm$ 125.31                 | 7116                                               |
| W3-T0-1          | 1657.75   | 1407.35   | 2084.60   | 1716.57 $\pm$ 342.43                | 18882                                              |
| W1-Ctrl-2        | 793.75    | 860.35    | 1008.60   | 887.57 $\pm$ 109.98                 | 9763                                               |
| W2-Ctrl-2        | 958.75    | 650.35    | 1166.60   | 925.23 $\pm$ 259.75                 | 10178                                              |
| W3-Ctrl-2        | 651.75    | 681.35    | 878.60    | 737.23 $\pm$ 123.32                 | 8110                                               |
| W1-Ctrl-3        | 461.75    | 424.35    | 576.60    | 487.57 $\pm$ 79.34                  | 5363                                               |
| W2-Ctrl-3        | 598.75    | 555.35    | 626.60    | 593.57 $\pm$ 35.91                  | 6529                                               |
| W3-Ctrl-3        | 918.75    | 1003.35   | 939.60    | 953.90 $\pm$ 44.08                  | 10493                                              |
| W1-T3-2          | 882.75    | 707.35    | 879.60    | 823.23 $\pm$ 100.37                 | 9056                                               |
| W2-T3-2          | 1471.75   | 1379.35   | 1758.60   | 1536.57 $\pm$ 197.76                | 16902                                              |

|          |         |         |         |                  |       |
|----------|---------|---------|---------|------------------|-------|
| W3-T3-2  | 1110.75 | 972.35  | 1238.60 | 1107.23 ± 133.16 | 12180 |
| W1-T3-3  | 845.75  | 838.35  | 1093.60 | 925.90 ± 145.28  | 10185 |
| W2-T3-3  | 720.75  | 682.35  | 954.60  | 785.90 ± 147.35  | 8645  |
| W3-T3-3  | 1276.75 | 1256.35 | 1333.60 | 1288.90 ± 40.03  | 14178 |
| W1-T24-2 | 760.75  | 1242.90 | 924.60  | 976.08 ± 245.16  | 10737 |
| W2-T24-2 | 1715.75 | 1490.35 | 1978.60 | 1728.23 ± 244.36 | 19011 |
| W3-T24-2 | 770.75  | 630.35  | 824.60  | 741.90 ± 100.29  | 8161  |
| W1-T24-3 | 1443.75 | 1231.35 | 1487.60 | 1387.57 ± 137.05 | 15263 |
| W2-T24-3 | 1357.75 | 1236.35 | 1524.60 | 1372.90 ± 144.72 | 15102 |
| W3-T24-3 | 929.75  | 1324.35 | 1634.60 | 1296.23 ± 353.27 | 14259 |

**Supplementary Table S3.** Permutation Multivariate Analysis of Variance (weighted UniFrac distance matrix) of mucus and water samples at different time points.

| <b>Factors</b>                       | <b>P-value</b> |
|--------------------------------------|----------------|
| Mucus:T0 vs. T3                      | 0.012          |
| Mucus:T0 vs. T24                     | 0.001          |
| Mucus:T3 vs. T24                     | 0.001          |
| Mucus at T3: Tank_2 vs. Tank_3       | 0.650          |
| Mucus at T24: Tank_2 vs. Tank_3      | 0.082          |
| Mucus time (T0, T3, T24)             | 0.001          |
| Mucus tanks (Tank_1, Tank_2, Tank_3) | 0.011          |
| Mucus vs. water                      | 0.001          |
| T0: water vs. mucus                  | 0.001          |
| T3: water vs. mucus                  | 0.001          |
| T24: water vs. mucus                 | 0.001          |
| Water: T0 vs. T3                     | 0.044          |
| Water: T0 vs. T24                    | 0.214          |
| Water: T3 vs. T24                    | 0.096          |
| Water: T0 vs. Ctrl                   | 0.020          |
| Water: T3 vs. Ctrl                   | 0.016          |
| Water: T24 vs. Ctrl                  | 0.165          |
| Water at T3: Tank_2 vs. Tank_3       | 0.100          |
| Water at T24: Tank_2 vs. Tank_3      | 0.500          |
| Water time (T0, T3, T24)             | 0.186          |
| Water tanks (Tank_1, Tank_2, Tank_3) | 0.053          |

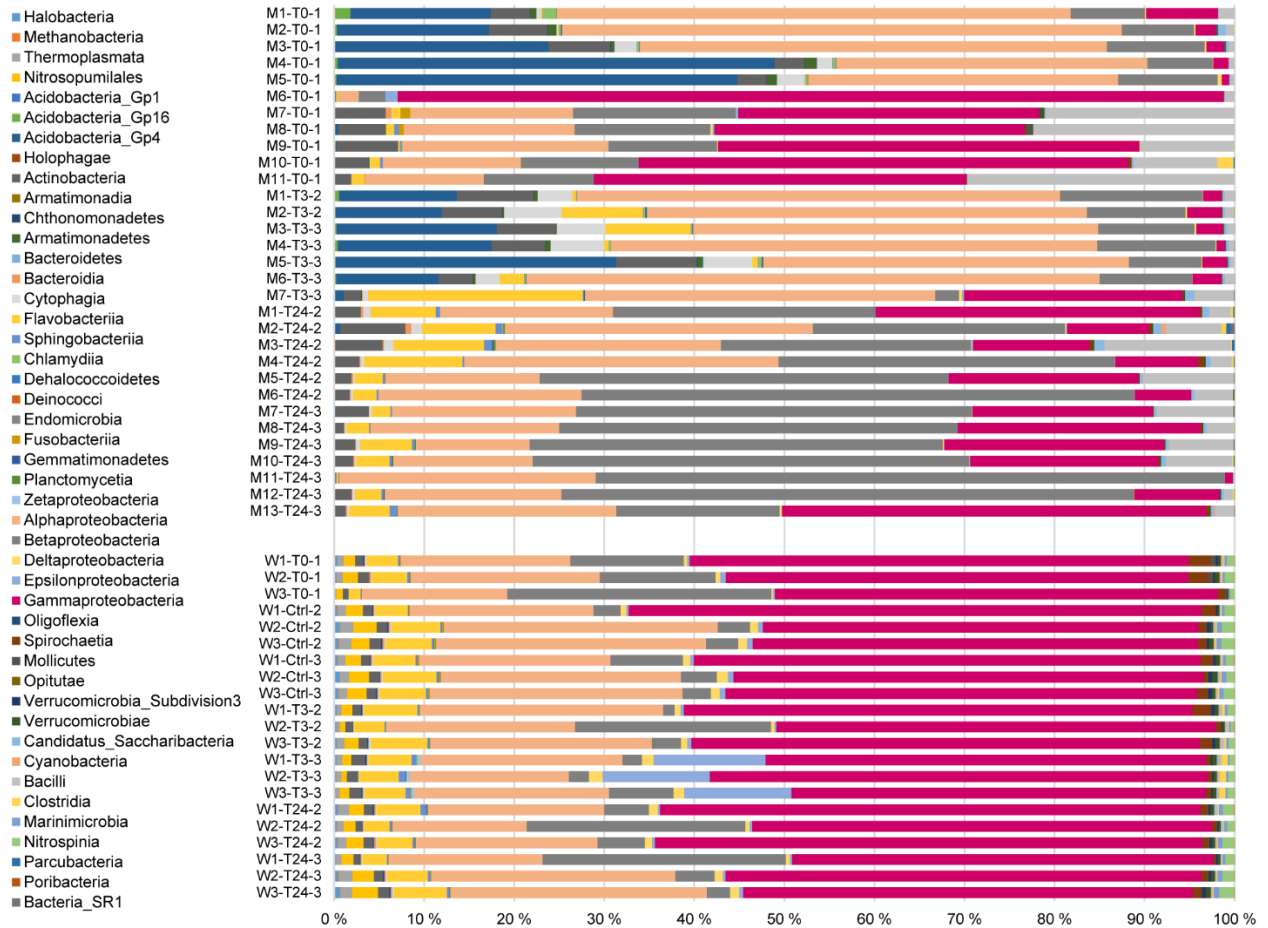

**Supplementary Figure S1.** Relative abundance of phylotypes at the class level inherent to the mucus and water microbiomes at the different time points (T0, T3, T24 + Ctrl water).
